# Supplementary material for: Allogeneic CD19/CD22 CAR T-Cell Therapy for B-Cell Acute Lymphoblastic Leukemia
Source: PubMed Central journal article supplement (PMC11190796; doi:10.1001/jamaoncol.2024.0473), 2024-04-18
Supplement: jamaoncol-e240473-s002.pdf [file jamaoncol-e240473-s002.pdf]

## Data Sharing Statement

Phely. Allogeneic CD19/CD22 CAR T-Cell Therapy for B-Cell Acute Lymphoblastic Leukemia. *JAMA Oncol.* Published April 18, 2024. doi:10.1001/jamaoncol.2024.0473

### Data

**Data available:** Yes

**Data types:** Deidentified participant data

**How to access data:** All datasets of the current study will be available from the corresponding author on reasonable request ([Claudia.Lengerke@med.uni-tuebingen.de](mailto:Claudia.Lengerke@med.uni-tuebingen.de))

**When available:** With publication

### Supporting Documents

**Document types:** None

### Additional Information

**Who can access the data:** researchers whose proposed use of the data has been approved

**Types of analyses:** for any purpose

**Mechanisms of data availability:** with investigator support
